# Supplementary material
Source: PubMed Central journal article supplement (PMC3578159)
Supplement: NIHMS424360-supplement-Supp_TableS1.pdf [file NIHMS424360-supplement-Supp_TableS1.pdf]

| <b>Early genes:</b>  | <b>FULL NAME</b>                                                                                                | <b>BRIEF DESCRIPTION OF FUNCTION</b>                                                                                                                                                                 |
|----------------------|-----------------------------------------------------------------------------------------------------------------|------------------------------------------------------------------------------------------------------------------------------------------------------------------------------------------------------|
| Ablim3               | Actin binding LIM protein 3.                                                                                    | LIM domain proteins play key roles in embryonic development and cell lineage determination                                                                                                           |
| Adk5                 | Adenosine kinase 5, isoform 1                                                                                   | Striatopallidal-specific expression                                                                                                                                                                  |
| Akap8                | A kinase (PRKA) anchor protein 8                                                                                | AKAPs controls intracellular organization of PKA                                                                                                                                                     |
| AUF1                 | AU-rich element RNA-binding protein 1                                                                           | HNRNP, heterogeneous nuclear ribonucleoprotein D. Regulates cell-specific expression of the enkephalin gene.                                                                                         |
| Brn-4                | Brain-4, POU3F4 - POU domain class3                                                                             | Regulates striatal D1 dopamine receptor gene transcription. Brn4 and Tbx1, the gene responsible for velo-cardio-facial syndrome/DiGeorge syndrome in humans, regulate retinoic acid metabolic genes. |
| C-myb                | transcriptional activator Myb                                                                                   | similar to Myb proto-oncogene protein                                                                                                                                                                |
| CART                 | Cocaine- and amphetamine-regulated transcript                                                                   | Colocalization of CART peptide with dopamine D1 receptors                                                                                                                                            |
| Ccrn4l               | Carbon catabolite repression 4-like                                                                             | (Nocturnin (Noc)) is a circadian deadenylase, maintenance of the undifferentiated state.                                                                                                             |
| Cdh4                 | cadherin 4                                                                                                      | Mus musculus cadherin 4, regional adhesive codes to guide pioneer axons                                                                                                                              |
| Ctip2                | Chicken ovalbumin upstream promoter transcription factor-interacting protein 2; BCL11B, B-cell CLL/Lymphoma 11B | In the absence of Ctip2, MSNs do not fully differentiate.                                                                                                                                            |
| Dpysl3               | Dihydropyrimidinase-like 3                                                                                      | Phosphoprotein, homology to Unc33 - neuritic outgrowth and guidance in C. elegans                                                                                                                    |
| Ebf1                 | Early B-cell factor 1                                                                                           | Important for development of the striatal matrix neurons                                                                                                                                             |
| Epha4                | Eph receptor A4                                                                                                 | EphA4 expression promotes network activity and spine maturation in cortical neuronal cultures.                                                                                                       |
| FoxP1                | Forkhead box P1                                                                                                 | Promotes midbrain identity in embryonic stem cell-derived dopamine neurons                                                                                                                           |
| Gnb4                 | Guanine nucleotide-binding protein, beta-4                                                                      | Beta subunit of a G-protein, stimulates phospholipase beta2                                                                                                                                          |
| Ikaros               | IKZF1, Ikaros family zinc finger 1                                                                              | Critical factor for the correct development of late-born ENK-positive striatal projecting neurons.                                                                                                   |
| NM23B                | Non-metastatic cells 2 protein (Nme2, NM23H2)                                                                   | Eegulation of the cellular content and compartmentalization of G proteins. interacts with PP2A.                                                                                                      |
| Rapgef5              | Rap guanine nucleotide exchange factor                                                                          | Involved in telencephalic neurogenesis; particularly in the development of GABAergic interneurons                                                                                                    |
| RARBV1               | retinoic acid receptor beta type, variant 1                                                                     | Mutant mice show altered levels of D1Rs and D2Rs in the striatum.                                                                                                                                    |
| RXRg                 | Retinoid X Receptor, gamma                                                                                      | Modular patterning of structure and function of the striatum.                                                                                                                                        |
| Trim28               | Tripartite motif-containing 28, TIF1-beta, KAP1 - a KRAB binding corepressor                                    | Modifier of epigenetic gene silencing, reduces phenotypic noise, TRIM24 in humans                                                                                                                    |
| Tubb2b               | Tubulin, beta 2b                                                                                                | Involved in a large spectrum of neuronal migration disorders.                                                                                                                                        |
| Tubb3                | tubulin, beta 3                                                                                                 | Mutations associated with various neurological syndromes                                                                                                                                             |
| Ube2v1               | Ubiquitin-conjugating enzyme E2 variant 1                                                                       | Activator of c-fos expressed from proliferation through to maturation of multiple neuronal cell types                                                                                                |
| Znf521               | Zinc finger protein 521 (/Evi3/ Zfp521)                                                                         | TF partner of Ebf-1, regulates Ebf1 activity                                                                                                                                                         |
| <b>S01</b>           | <i>FoxP1-like expression pattern</i>                                                                            | a cDNA clone of as yet unclassified gene, very closely parallels FoxP1 expression, in 3'UTR of Celf2 / CUGBP                                                                                         |
| <b>S02</b>           |                                                                                                                 | a cDNA clone of as yet unclassified gene, possibly Nfib (some homology to Mus musculus nuclear factor I/B)                                                                                           |
| <b>S03</b>           |                                                                                                                 | a cDNA clone of as yet unclassified gene, weak match to human DPYSL3, which colocalizes with GAP43                                                                                                   |
| <b>S04</b>           |                                                                                                                 | homology to sequence flanking Trim67. Trim67 inhibits LPS-induced phosphorylation of ERK-2                                                                                                           |
| <b>S05</b>           |                                                                                                                 | rattus norvegicus similar to RIKEN cDNA 2700081O15 (RGD1560108)                                                                                                                                      |
| <b>S06</b>           | <i>Tubulin-like expression pattern</i>                                                                          | Rattus norvegicus cDNA clone etnofatP0050B12 5'                                                                                                                                                      |
| <b>S08</b>           |                                                                                                                 | AMGNNUC:NRHY5-00469-B11-A W Rat hypothalamus, some homology to human SLIT-ROBO Rho GTPase                                                                                                            |
| <b>Mature genes:</b> |                                                                                                                 |                                                                                                                                                                                                      |
| Adora2a              | Adenosine A(2A) receptor                                                                                        | Parallels perfectly the expression pattern of D2Rs                                                                                                                                                   |
| Aqp4                 | Aquaporin 4                                                                                                     | Plays a role in recovery from neuronal activation                                                                                                                                                    |
| CaMKII $\alpha$      | Calcium/calmodulin-dependent protein kinase II, alpha subunit                                                   | AMPA, NMDA and DA receptor signaling                                                                                                                                                                 |
| CaMKII $\beta$       | Calcium/calmodulin-dependent protein kinase II, beta subunit                                                    | AMPA, NMDA and DA receptor signaling                                                                                                                                                                 |
| Clk4                 | Cdc2-like kinase 4                                                                                              | May be involved in the regulation of alternative splicing                                                                                                                                            |
| D1R                  | Dopamine receptor 1                                                                                             |                                                                                                                                                                                                      |
| D2R                  | Dopamine receptor 2                                                                                             |                                                                                                                                                                                                      |
| DARPP32              | Dopamine and cyclic AMP-regulated phosphoprotein                                                                | Critical mediator of dopamine function. The most commonly used MSN marker                                                                                                                            |
| Dream                | Calsenilin, KChIP3                                                                                              | Binds the dynorphin response element and regulates dynorphin (repressing) expression                                                                                                                 |
| Dynorphin            |                                                                                                                 | Co-expressed with D1Rs, binds kappa opioid receptor, exerts inhibitory actions on glutamatergic neurons.                                                                                             |
| Enkephalin           |                                                                                                                 | Co-expressed with D2Rs, binds delta opioid receptors, provides inhibitory modulation of neurons                                                                                                      |
| Fbxl16               | F-box and leucine-rich repeat protein 16                                                                        | novel gene, very little info, this gene family is involved in cell proliferation                                                                                                                     |
| Gpr158               | G protein-coupled receptor 158                                                                                  | Member of the metabotropic glutamate family of G-protein coupled receptor 3 family                                                                                                                   |
| Grina                | Glutamate receptor, ionotropic, NMDA-associated                                                                 | Glutamate-binding subunit of the NMDA receptor (NMDARA1)                                                                                                                                             |
| NKB                  | Neurokinin B                                                                                                    | Co-localized with D1Rs in a unique population of striatal projection neurons                                                                                                                         |
| NK3R                 | Neurokinin B receptor (NKB-R)                                                                                   | Activates both phosphatidylinositol hydrolysis and the cAMP signal cascade                                                                                                                           |
| SLC1A2               | Solute carrier family 1                                                                                         | Solute carrier family 1 glial high affinity glutamate transporter member 2, actively removes the excitatory neurotransmitter glutamate from the extracellular space                                  |
| Slc35d3              | Solute carrier family 35, member D3                                                                             | One of the most strongly striatonigral-specifically expressed genes, used as MSN marker                                                                                                              |
| S07                  | <i>D2R/DRRF-like expression pattern</i>                                                                         | similar to adenylate kinase 5 isoform 1                                                                                                                                                              |
| S09                  |                                                                                                                 | Rattus norvegicus cDNA clone UI-R-CA1-bli-a-01-0-UI 3'                                                                                                                                               |
| <b>Myelination</b>   |                                                                                                                 |                                                                                                                                                                                                      |
| Mag                  | myelin-associated glycoprotein                                                                                  |                                                                                                                                                                                                      |
| MBP                  | Myelin basic protein                                                                                            | Reduced MBP expression in schizophrenia                                                                                                                                                              |
| Mobp                 | Myelin-associated oligodendrocyte basic protein                                                                 | the third most abundant protein in CNS myelin                                                                                                                                                        |
| Mog                  | Myelin oligodendrocyte glycoprotein                                                                             | Can to induce autoimmune encephalomyelitis                                                                                                                                                           |
| Ppl1                 | Proteolipid protein 1                                                                                           | Primary constituent of myelin, increase in Ppl gene dosage resulted in hypomyelination, astrocytosis & seizures                                                                                      |
| Tf                   | Transferrin                                                                                                     | Involved in oligodendroglial cell differentiation                                                                                                                                                    |
| <b>Transitional</b>  |                                                                                                                 |                                                                                                                                                                                                      |
| DRRF                 | Dopamine receptor regulating factor                                                                             | reduces D1, D2 & D3R expression (Hwang et al. 2001, Lee et al. 2008).                                                                                                                                |
| S10 Map1b            |                                                                                                                 | match to 3'UTR of microtubule-associated protein 1B                                                                                                                                                  |
| S11                  |                                                                                                                 | hypothetical protein LOC100233206                                                                                                                                                                    |
