# Supplementary material
Source: PubMed Central journal article supplement (PMC3578159)
Supplement: NIHMS424360-supplement-Supp_TableS2.pdf [file NIHMS424360-supplement-Supp_TableS2.pdf]

| <b>Early genes:</b> | <b>FULL NAME</b>                                                             | <b>Early genes (cont.):</b> | <b>FULL NAME</b>                                                                                         |
|---------------------|------------------------------------------------------------------------------|-----------------------------|----------------------------------------------------------------------------------------------------------|
| Akap12              | A kinase (PRKA) anchor protein 12                                            | RPL10A                      | ribosomal protein L10A                                                                                   |
| Anapc5              | anaphase-promoting complex subunit 5                                         | Rpl7a, Tens1                | ribosomal protein L7a pseudogene and the 3'end of the Tens1 gene for tensin-like SH2 domain containing 1 |
| Atp1a3              | ATPase, Na <sup>+</sup> /K <sup>+</sup> transporting, alpha 3 polypeptide    | Runx1t1                     | runt-related transcription factor 1; translocated to, 1 (cyclin D-related)                               |
| Brd7                | bromodomain containing 7                                                     | Scrn1                       | secernin 1, KIAA0193                                                                                     |
| Brsk1               | BR serine/threonine kinase 1                                                 | Sema3a                      | semaphorin 3A                                                                                            |
| C1qI3, Pter         | C1q-like 3, phosphotriesterase related                                       | Sh3bp5                      | SH3-domain binding protein 5 (BTK-associated)                                                            |
| Ctnnd1              | catenin (cadherin associated protein), delta 1                               | Sox11                       | SRY-box containing gene 11                                                                               |
| Dopey1              | dopey family member 1                                                        | Sox4                        | SRY (sex determining region Y)-box 4                                                                     |
| Dpysl3-like         | Rattus norvegicus dihydropyrimidinase 3-like                                 | Spag9                       | sperm associated antigen 9                                                                               |
| Dpysl5              | Rattus norvegicus dihydropyrimidinase-like 5                                 | Sparc                       | secreted protein, acidic, cysteine-rich (osteonectin)                                                    |
| Eif2ak2             | eukaryotic translation initiation factor 2-alpha kinase 2                    | Spire1                      | spire homolog 1 (Drosophila)                                                                             |
| EIF4G2              | eukaryotic translation initiation, factor 4 gamma 2-like                     | SRGAP2                      | SLIT-ROBO Rho GTPase activating protein 2                                                                |
| Epha7               | Ephrin type-A receptor 7                                                     | Stmn1                       | stathmin 1                                                                                               |
| Flrt2               | fibronectin leucine rich transmembrane protein 2                             | Sumo2                       | suppressor of mif two 3 homolog 2 (S. cerevisiae)                                                        |
| Fnbp1l              | Mus musculus formin binding protein 1-like                                   | Tnks                        | tankyrase, Tnks, TRF1-interacting ankyrin-related ADP-ribose polymerase                                  |
| GNB1                | guanine nucleotide binding protein (G protein), beta polypeptide 1           | Ttc9                        | tetratricopeptide repeat domain 9                                                                        |
| Gnb4                | similar to mouse Gnb4 guanine nucleotide binding protein (G protein), beta 4 | Tuba1a                      | tubulin, alpha 1A                                                                                        |
| Gng2                | guanine nucleotide binding protein (G protein) gamma 2                       | Tubb2b/2a                   | tubulin, beta 2B class IIB (Tubb2b) or (Tubb2a)                                                          |
| Gtf2e1              | general transcription factor IIE, polypeptide 1 (alpha subunit)              | Zfp180                      | zinc finger protein 180                                                                                  |
| HMG-2               | similar to High mobility group protein 2                                     | Zfp426I2                    | zinc finger protein 426-like 2                                                                           |
| Hnrnpa1             | heterogeneous nuclear ribonucleoprotein A1                                   | S12                         | Chromosome 8, 767bp fragment, Features in this part of subject sequence: cell adhesion molecule          |
| Hnrph1              | heterogeneous nuclear ribonucleoprotein H1                                   | S13                         | EST (rat); Chromosome 2                                                                                  |
| Ier3ip1             | immediate early response 3 interacting protein 1                             | S14                         | EST (rat); Chromosome 18                                                                                 |
| Ilf3, Dcaf7         | interleukin enhancer binding factor 3, DDB1 and CUL4 associated factor 7     | S15                         | EST (rat); Chromosome 16                                                                                 |
| Isca1               | iron-sulfur cluster assembly 1 homolog (S. cerevisiae)                       | S16                         | Est / mitochondrial                                                                                      |
| Kifap3              | kinesin-associated protein 3                                                 | S17                         | EST (rat); Chromosome 6                                                                                  |
| L10A                | ribosomal protein L10A                                                       | S18                         | EST (rat); Chromosome 6                                                                                  |
| L1cam               | L1 cell adhesion molecule                                                    | S19                         | EST (rat); Chromosome 1                                                                                  |
| Limch1              | LIM and calponin homology domains 1                                          | S20                         | EST (rat); Chromosome 15                                                                                 |
| Map6                | microtubule-associated protein 6                                             | S21                         | EST (rat); Chromosome 18, some homology to human D4S114 (D0H4S114)                                       |
| mito.               | ATP synthase 6                                                               | <b>Mature genes:</b>        |                                                                                                          |
| Mpped2              | metallophosphoesterase domain containing 2                                   | Acvr1c                      | activin A receptor, type IC                                                                              |
| Ncan                | neurocan                                                                     | Add1                        | adducin 1 (alpha)                                                                                        |
| Nell2               | nel-like 2 splice variant                                                    | Ar12bp                      | ADP-ribosylation factor-like 2 binding protein                                                           |
| Nf2                 | neurofibromin 2 (merlin)                                                     | Camsap2                     | calmodulin regulated spectrin-associated protein family, member 2                                        |
| Nono                | non-POU domain containing, octamer-binding                                   | Cldn11                      | claudin 11                                                                                               |
| Nr2c2               | nuclear receptor subfamily 2, group C, member 2                              | Csrp1                       | cysteine and glycine-rich protein 1                                                                      |
| NRP                 | neuropilin and tolloid (TLL)-like 2                                          | Evi2a                       | ecotropic viral integration site 2A                                                                      |
| Nsg1                | neuron specific gene family member 1                                         | Ganab                       | glucosidase, alpha; neutral AB                                                                           |
| Olfm2               | olfactomedin 2                                                               | Hspa8                       | heat shock 70kDa protein 8                                                                               |
| Papolg              | poly(A) polymerase gamma                                                     | Mss4                        | mammalian suppressor of Sec4                                                                             |
| Pcbp4               | poly(rC) binding protein 4                                                   | Pgk1                        | phosphoglycerate kinase 1                                                                                |
| Pcdh10              | protocadherin 10, transcript variant 3                                       | Prpf8                       | PRP8 pre-mRNA processing factor 8 homolog, transcript variant 1                                          |
| Psm2                | prosome, macropain, non-ATPase, 2                                            | Secisbp2l                   | SECIS binding protein 2-like                                                                             |
| Rbm41, Rtn1         | RNA binding motif protein 41, Rattus norvegicus reticulon 1                  | Sirt2                       | sirtuin 2                                                                                                |
