# Supplementary material
Source: PubMed Central journal article supplement (PMC3578159)
Supplement: NIHMS424360-supplement-Supp_TableS4.pdf [file NIHMS424360-supplement-Supp_TableS4.pdf]

| GENE                    | NCBI ACCESSION #    | FORWARD PRIMER              | REVERSE PRIMER              |
|-------------------------|---------------------|-----------------------------|-----------------------------|
| <b>Ablim3</b>           | NM_001191698.1      | GCATGACCATCTCAGAGTTCGA      | ACAGCCTCCGCCTAGAACAG        |
| <b>Adora2a</b>          | NM_053294           | GTCTGGTCCCTCACGCAGA         | CACCTGTCCACCAAGCCATTG       |
| <b>Akap8</b>            | NM_053855.1         | ATTGGCCAGGAGCATTTCTTC       | TGGTGCTGTGCAGGAATCAG        |
| <b>Aqp4</b>             | NM_001142366.1      | CTCGTGGCTGTCTGGGAACT        | GGCAGCAAGATAATGGACCACTA     |
| <b>AUF1</b>             | NM024404            | GGCAGAGGGAGCGAAGATC         | CCCAGCTAAGGCCTCCTATAAAC     |
| <b>Arpp19</b>           | NM_031660           | TGCAGCCCCGGATAAGAC          | CTAGCAACAAGGGATGGTTTCC      |
| <b>b-glucuronidase</b>  | Y00717              | AGAGGTTACGGTTCAGTGC         | TCCCCCTTGTGTTGGTTCA         |
| <b>Brn-4</b>            | NM_017252           | GGCTGATTCATCCACAGGAAG       | TTCAGTACGCCCTTGACACT        |
| <b>C-myb</b>            | XR_086102.2         | TGTGGGAAGACAGAGGACCAG       | ACATGACCAGAGTCCGAGCTG       |
| <b>CaMKIIa</b>          | NM_012920           | AGGATGAAGACACCAAAGTGC       | GGAAATGACAGCCTTTGAACC       |
| <b>CaMKIIb</b>          | NM_001042354        | ACCTCATTTGAGCCTGAAGC        | CGATCCACACCACTATCCTG        |
| <b>CART</b>             | NM_017110           | GCCAAGTCCCATGTGTGAC         | CACCCCTTACAAGCACTTCA        |
| <b>Ccrn4l</b>           | NM_138526.1         | CGCAAAGATCCCCTGTATAG        | GAGGCTGGAGGAAGCAAAGTG       |
| <b>Cdh4</b>             | NM_009867.2 (mouse) | GCAATCAGCACTCTTCAACCC       | CAATGAAGCATCCTGTGCTGAG      |
| <b>Clk4</b>             | NM_001013041        | TTTGGAGCATAGGCTGCATTTC      | GAGTATCCGCTCCATCATTGC       |
| <b>Ctip2</b>            | NM_001108057        | AAATCCCAGGTGTCCATTGC        | CTAAGTGCCTATCAGCGTGAGATC    |
| <b>D1R</b>              | NM012546            | CCAGAAAGGAAGGGTAGGAGTTG     | GCATGCACCTACCTTTCCAATC      |
| <b>D2R</b>              | NM012547            | ACCCGGACCTCCCTTAAGAC        | TGAACACACCCGAGAACAATGG      |
| <b>D3R</b>              | NM017140            | TCACGTTCCTAATACCCACTGTCAAG  | TTCAGGGCACTGTTACATAGC       |
| <b>DARPP32</b>          | NM_138521           | ATTCGGATGTCTGCCCTTATTG      | TGCATTCTGGCACCAAAG          |
| <b>Dpysl3</b>           | NM_012934.1         | CGCCACAATGCGTTTGC           | CCAGTGAGGAACCTCCATCAG       |
| <b>Dream</b>            | NM032462            | AGGGCTTGACCAGCTACAG         | CCGTGGGACATTCGTTCTTG        |
| <b>DRRF</b>             | XM001075745         | AATGCGTCTCAGACAATCTTCTGT    | CCCAAGAGTGAAGAGCACACAA      |
| <b>Dynorphin</b>        | NM_019374.3         | CACCTGATCAGCCAGAAGC         | GATCACAAGGAGGCAAGCTG        |
| <b>Ebf1</b>             | NM_053820           | CAGTACTCCCTGTATCAAAGCC      | CCCATCAAAGAAATTGTCCCC       |
| <b>Enkephalin</b>       | NM_017139           | GGACTCGCTAAATGCAGCTA        | GTGTGCATGCCAGGAAGTTG        |
| <b>Epha4</b>            | NM_001162411.1      | CATGCTTAGAATGCCTGTGAATG     | TGGTCTCCGGCTCTCGTATATC      |
| <b>Fbxl16</b>           | NM_001009504.1      | CTGACGCTGGTCTAGAGGTGATG     | GCCTCGGTGAAATCGTTACAG       |
| <b>FoxP1</b>            | NM_001034131        | CAGCCACGTGGAAGAATGC         | ACGTTCTCTACTCGCACAAAACAC    |
| <b>Gnb4</b>             | NM_001013910        | CCCTTGCTGCGGTTAAGC          | TCCGGATAGGATAAAGTCAACAC     |
| <b>Gpr158</b>           | NM_001170326.1      | ACAAAGTAGTACTCCTCCGGTTATCTC | GCAGGAGGCAGAGGAGTAAAGAG     |
| <b>Grina</b>            | NM_153308           | TGAGCCCAGAAGAATATGTGTTTG    | GGCCAATGATGGTGAGAATGTATAG   |
| <b>Ikaros</b>           | XM223600            | GAGGTATTAGAATGGTGTGAGGTTTG  | GCTGAGAACCTCTAGCTAATTGACTTG |
| <b>Mag</b>              | NM_017190.4         | TCAAGTCCCGCACACAAGTG        | AGAAGCAGGGTGCAGTTTCG        |
| <b>Map1b</b>            | NM_019217.1         | ACAGAATCCGATGGGAAAAC        | GGTGTGCCAGATTGTGTAGG        |
| <b>MBP</b>              | NM_017026.2         | CTCTGGCCACTTCTCACTTTAGG     | TTCTAAGAGGCAGGGAATGGTTAC    |
| <b>Mobp</b>             | NM_012720.1         | AACAGCCAGCACGAAGCAG         | GTGTTACCAGAACCTAGGAGCTCTG   |
| <b>Mog</b>              | NM_022668.2         | TCCAAGAACAGGGACAATAACAAAC   | CCGTGCAGAAGTCGAGAATCTC      |
| <b>NKB</b>              | NM_019162           | TGATCTCTCTCTGCTACCTCCAC     | CCCTGTCTTTATGATGCAGTCC      |
| <b>NK3R / NKB-R</b>     | NM_017053           | CCAACTACTGCCGCTTCCA         | GAAATGTTGCTTGGACCTTCT       |
| <b>NM23B</b>            | NM_031833.2         | CCGATCTCTTTCTCGGCACTC       | TCGTGGGGATTCTGCATTC         |
| <b>Plp1</b>             | NM_030990           | TGCTGTGCCTGTGTACATTTACTTC   | ATCAGCGCAGAGACTGCCTATAC     |
| <b>Rapgef5</b>          | NM_001047915.1      | GGAGCTAGCGGCTGTTATTGC       | TCTGTACCGGTTACGTGTTTGTGTC   |
| <b>RARbV1</b>           | XM001059459         | CGTCTGCCAGGACAAGTCATC       | TCGGAAAAAGCCCTTGCA          |
| <b>RXRg</b>             | NM031765            | AAGCAGCTCTTACCCTTGTTG       | TGCCCCGAGCAGAATGAC          |
| <b>SLC1A2h, rat Est</b> | FQ082741.1 - Est    | AAGTCCGAGCTGGACACCAT        | ACTGCGTCTTGGTCATTTCGA       |
| <b>Tf</b>               | NM_001013110.1      | CAGCAGCAATGGGCAGATAG        | GGCATCTGCTTCTCCATTAC        |
| <b>Trim28</b>           | NM_053916.1         | TCTGCCGTGTATGCCAGAAG        | GGGAAGGGAGGTGACAATCC        |
| <b>Tubb2b</b>           | NM_001013886.2      | CCTCTGTGTAGTGGCCCTTTG       | GTCAGATCCGGACCATTGGG        |
| <b>Tubb3</b>            | NM_139254.2         | TCCGCTCATGGTAGCAGACA        | CGACAATGAAGCCCTCTACGA       |
| <b>Ube2v1</b>           | NM_001110345.2      | TAAGATAGAGTGTGGCCTAAGTATCC  | ACTGCTCACGCCACTCATATTG      |
| <b>Znf521/Evi3</b>      | NM_001107403        | TCCTGGCTACATTTGAAGCTTTG     | TCAACCGATTCAAGGATTTGG       |
| <b>S01</b>              |                     | available upon request      |                             |
| <b>S02</b>              | CK598023.1          | TGAACAAGGCTAATGTCCGAAAG     | CCAGGGCATAGAATAGGAAAACAC    |
| <b>S03</b>              | NW_047512.2         | CAGTGGGCAGTGATGTTAGCA       | CACGATTGGTTTTGGAAATGG       |
| <b>S04</b>              | CK477547.1 cDNA     | TAATAGCCACGTGAGAGGCAAAC     | GCAGCATGTCAGCCTTCATTC       |
| <b>S05</b>              | NM_001109161.2      | TCCAAGATTGCAAGGATTCC        | CCCGTCACTTCTGAGGTTGTC       |
| <b>S06</b>              | FM098268.1          | GCCGTTGGTAAATGAATAGATTCTG   | GGTGGTGTAGGCACACATGTAGAC    |
| <b>S07</b>              | NM_001108951.1      | TGTGCCTTGCACTCAATCACTAC     | CTGGAACGTATCAGCATTGTC       |
| <b>S08</b>              | CB744760.1 cDNA     | AATTTGAGAACAAGCCGAGCTT      | AAAGGCGTTC AAGGTGAGA        |
| <b>S09</b>              | NW_047696.2         | TCTCACAGCTTGCATGTCCTAAC     | TCGTGCTGTGGA AAAACC         |
| <b>S10 Map1b</b>        | NM_019217.1         | CCAGTGGATCAGTGACAGTTTTG     | AAGAACCATAGCCAGCCTTCAG      |
| <b>S11</b>              | XR_086213.1         | TCTTCTACATGTTGACCTCCAGTTG   | CACAGTAGCCAAAACCATCAAATG    |
