# Supplementary material
Source: PubMed Central journal article supplement (PMC3578159)

# Gene expression of the early transcriptional network

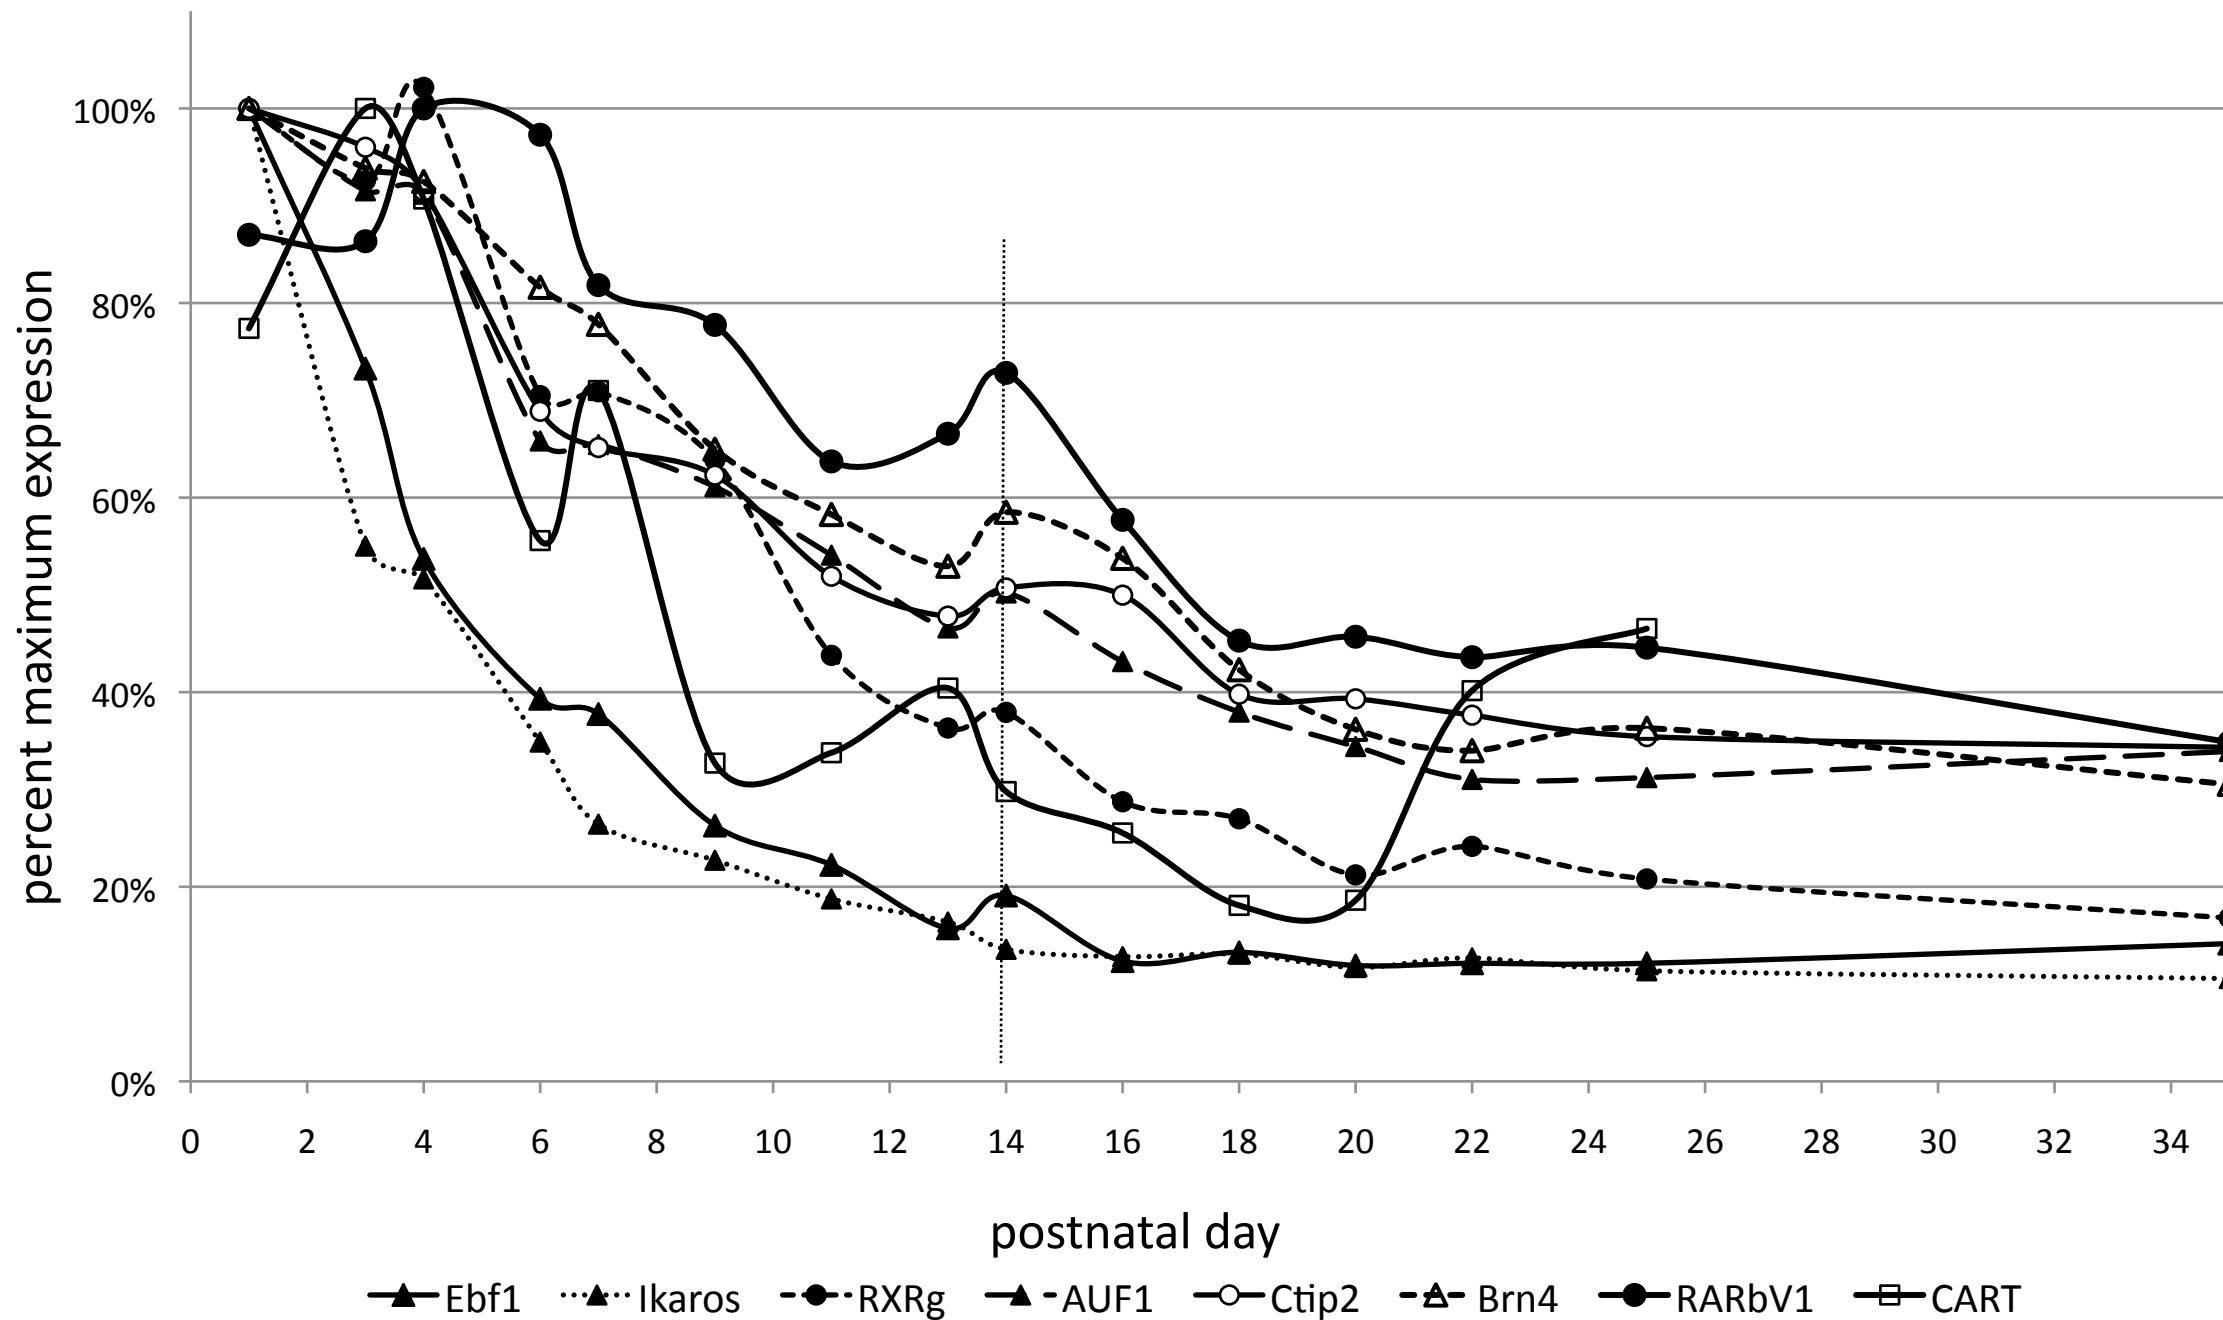

Supplement: NIHMS424360-supplement-Supp_FigureS1a.pdf [file NIHMS424360-supplement-Supp_FigureS1a.pdf]

# Gene expression of the mature transcriptional network

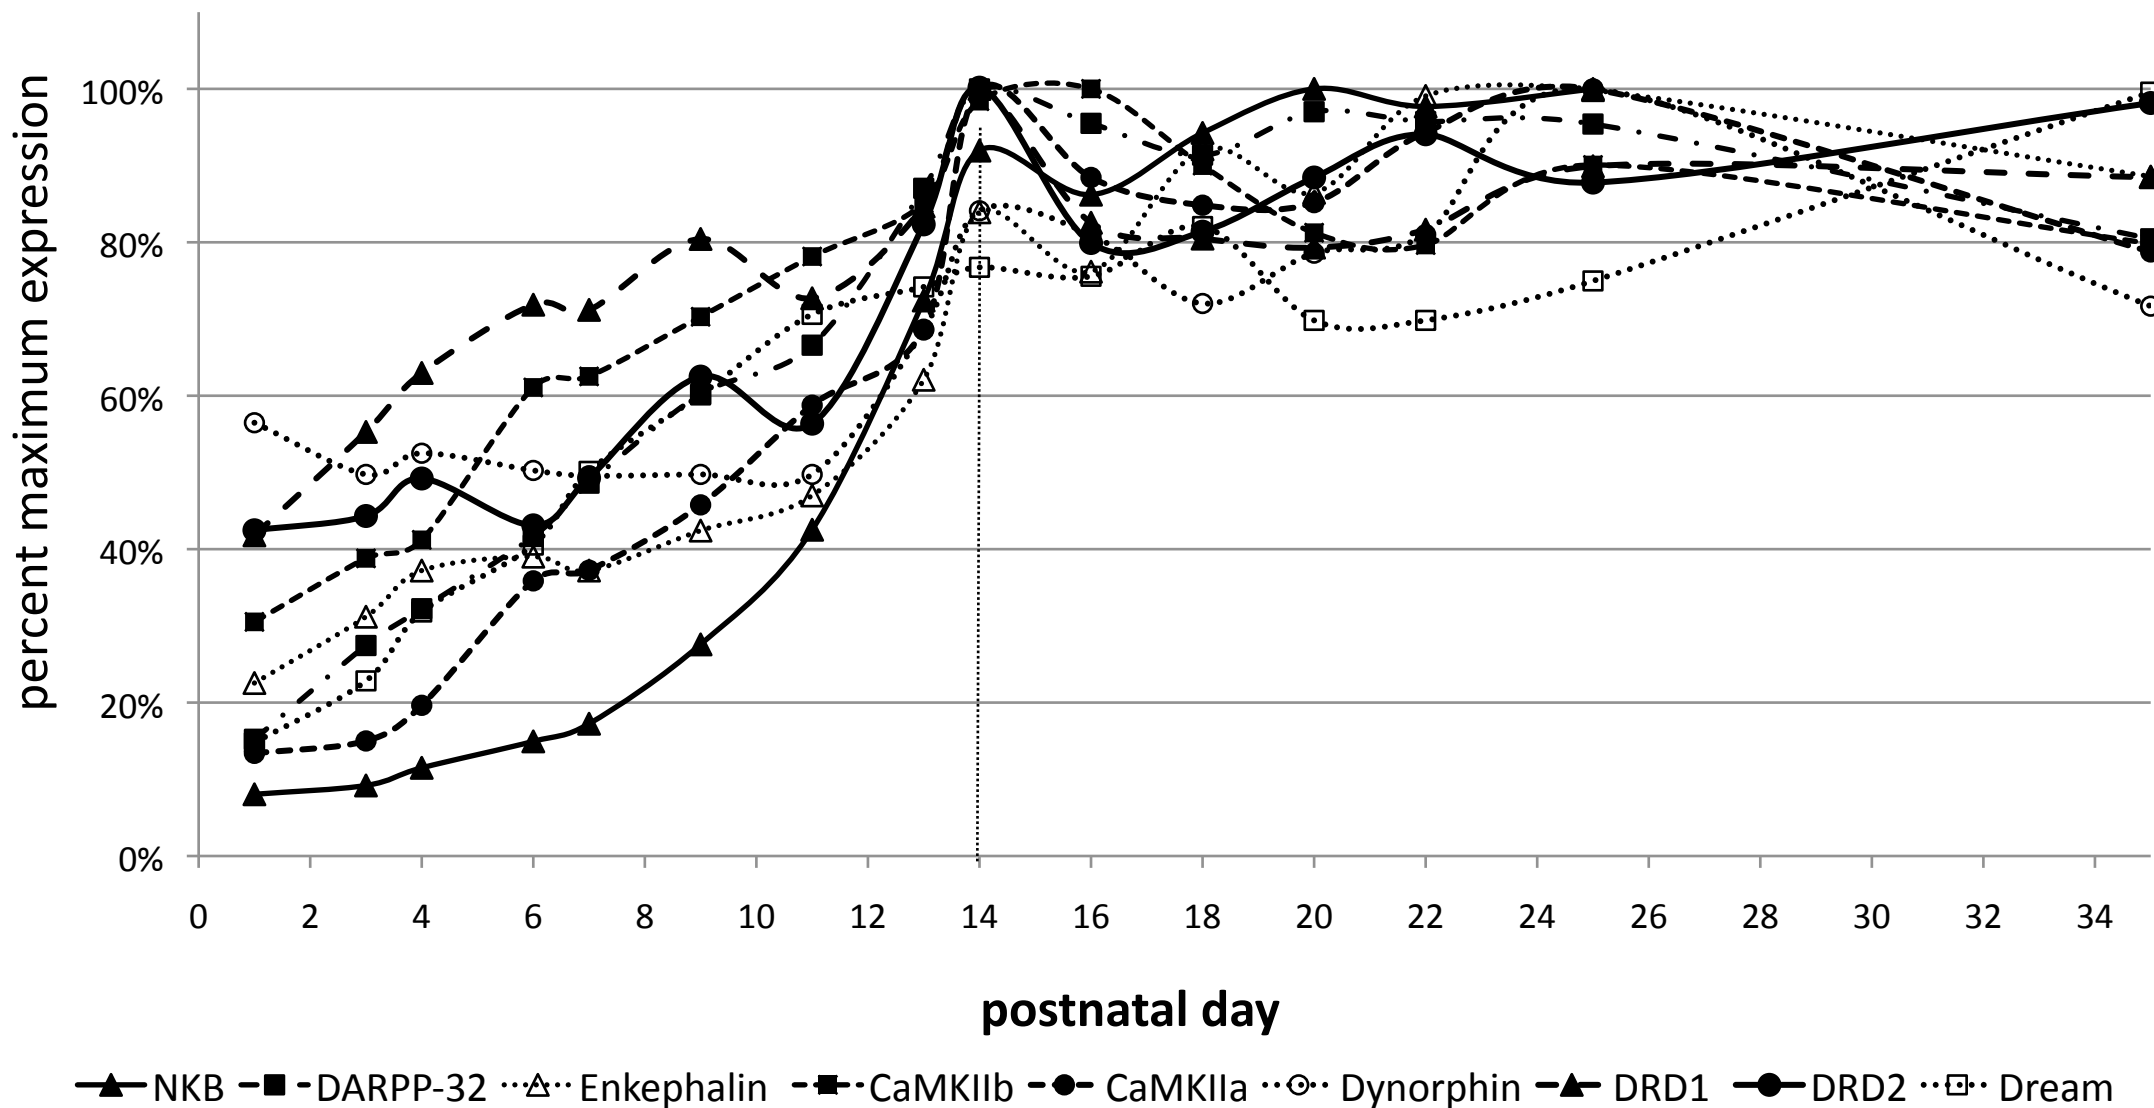

Supplement: NIHMS424360-supplement-Supp_FigureS1b.pdf [file NIHMS424360-supplement-Supp_FigureS1b.pdf]

# D2R

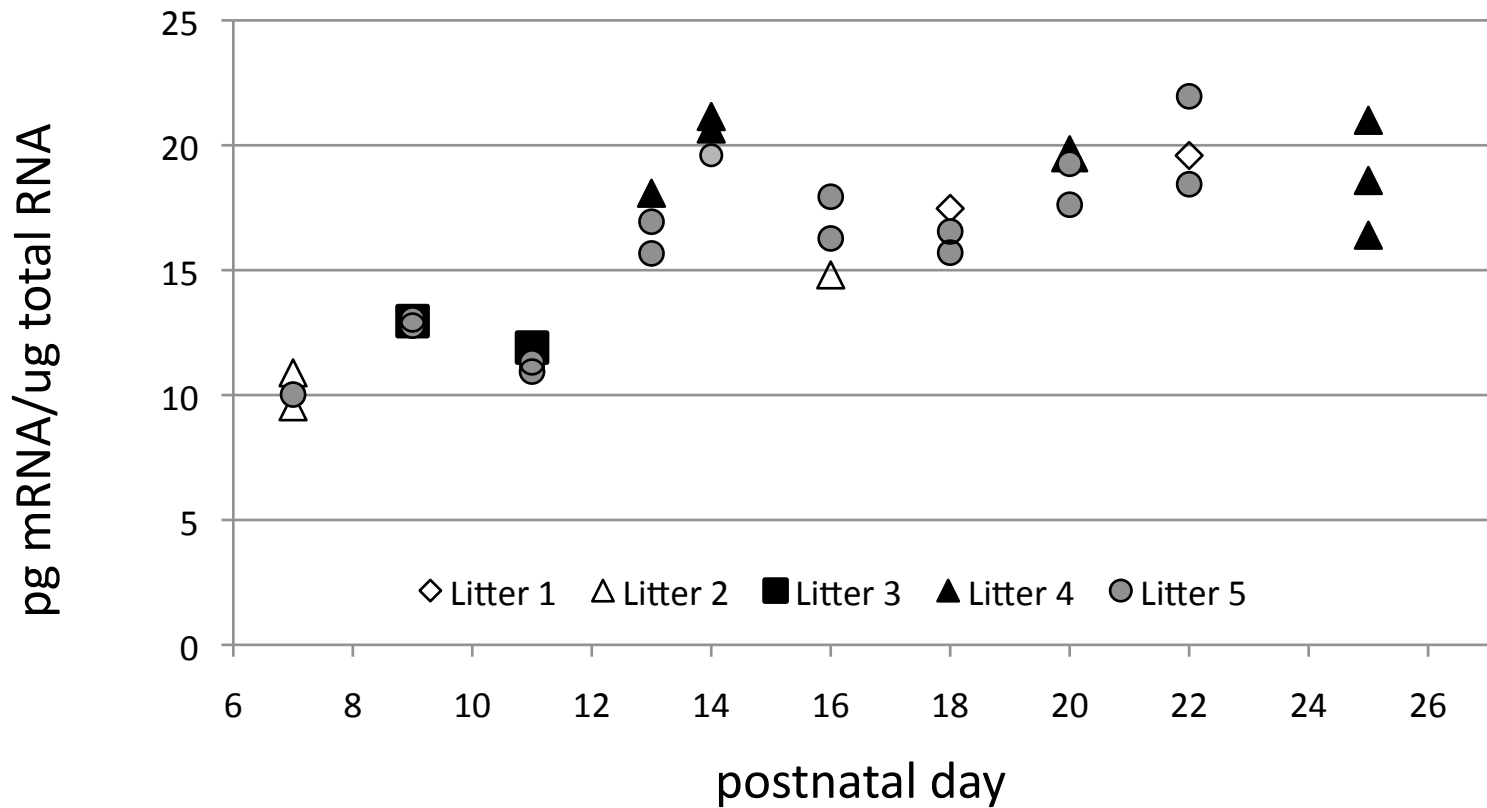

Supplement: NIHMS424360-supplement-Supp_FigureS2a.pdf [file NIHMS424360-supplement-Supp_FigureS2a.pdf]

# DRD2 mRNA expression in the striatum and in the frontal cortex

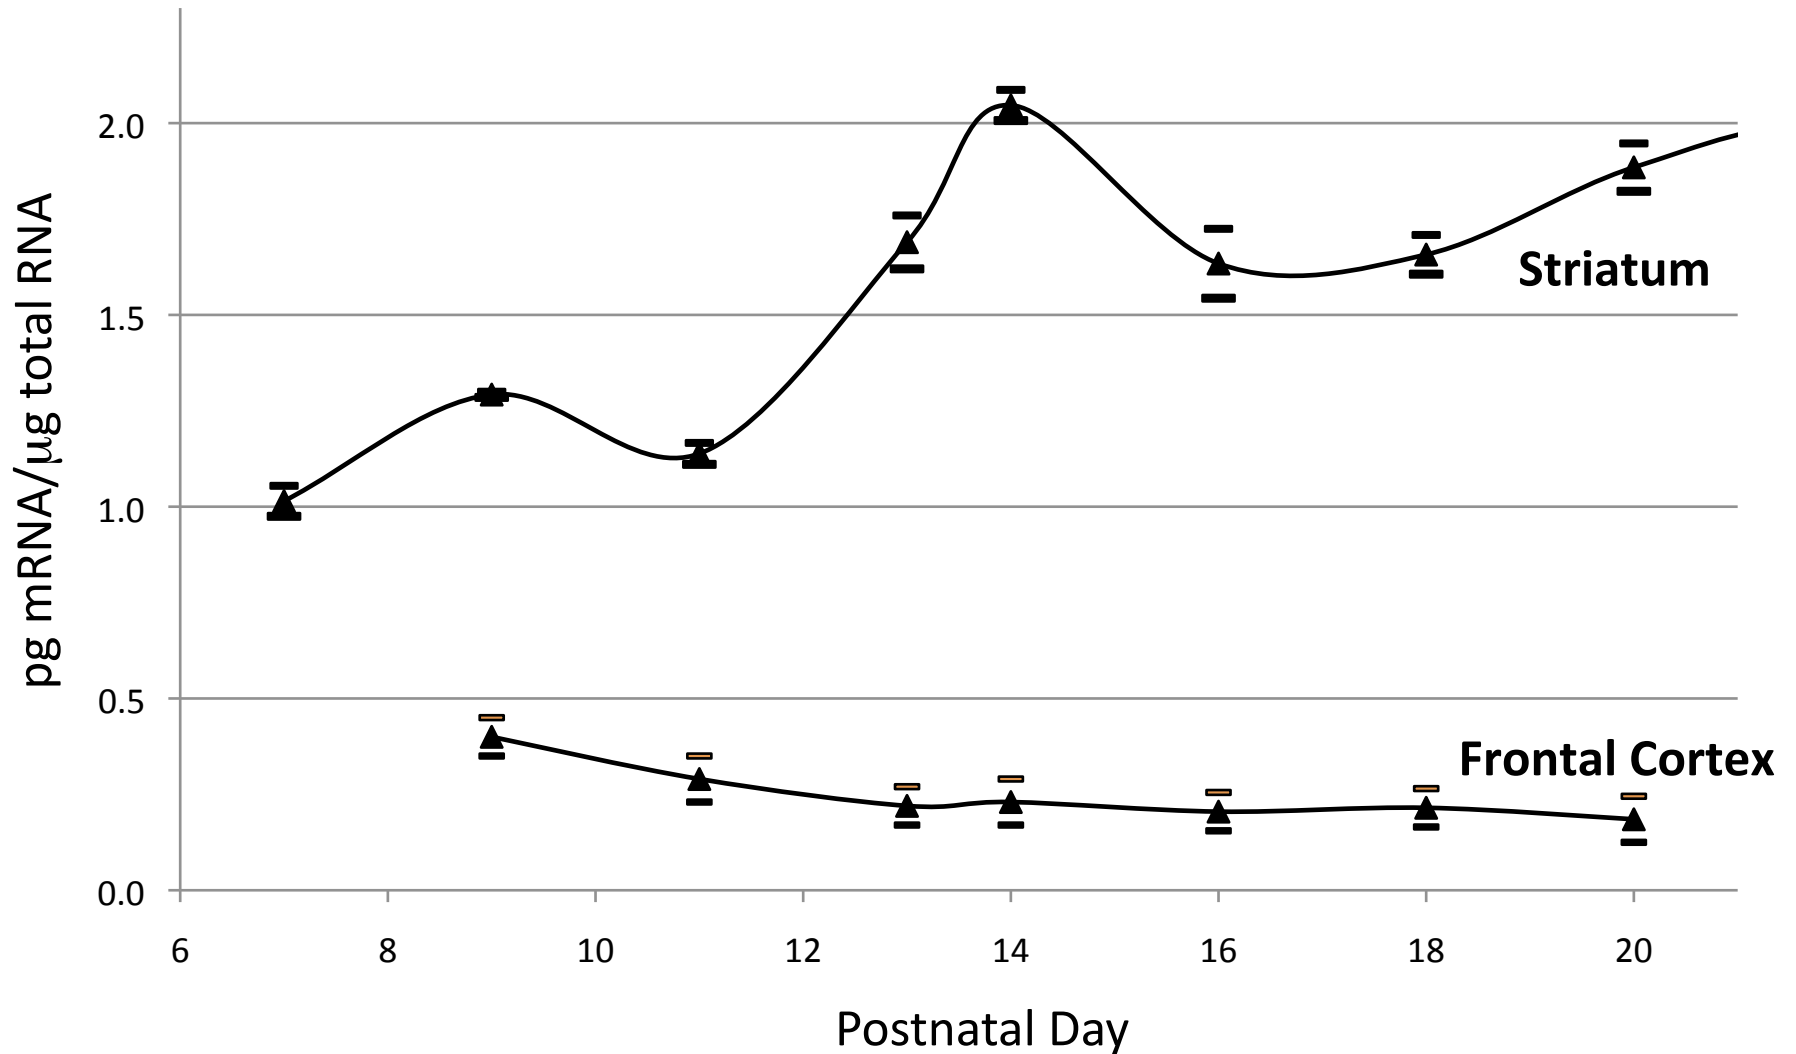

Supplement: NIHMS424360-supplement-Supp_FigureS2b.pdf [file NIHMS424360-supplement-Supp_FigureS2b.pdf]

# Transient expression of dopamine receptor regulating factor (DRRF)

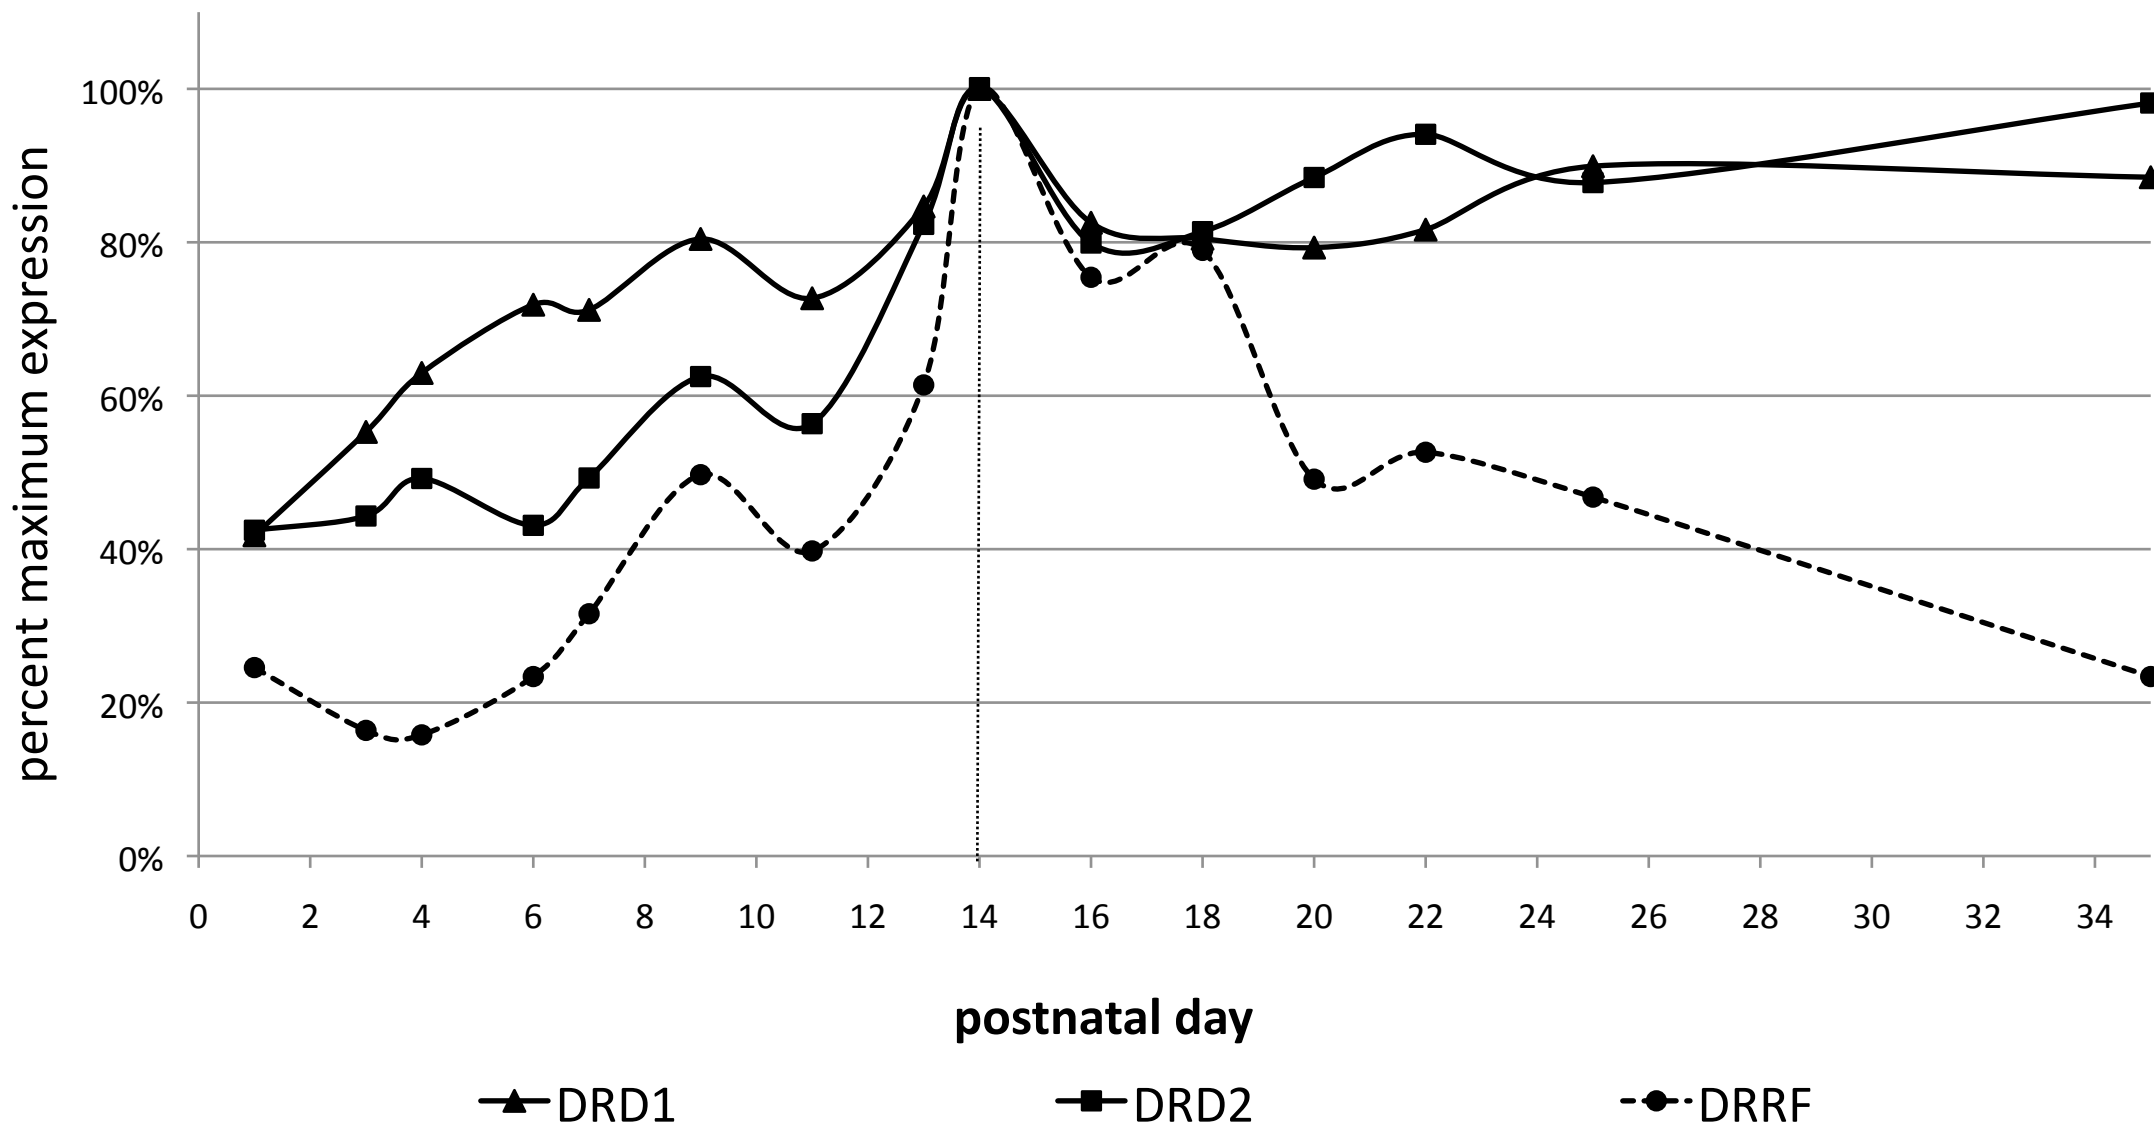

Supplement: NIHMS424360-supplement-Supp_FigureS2c.pdf [file NIHMS424360-supplement-Supp_FigureS2c.pdf]

# Expression of S01 and FoxP1

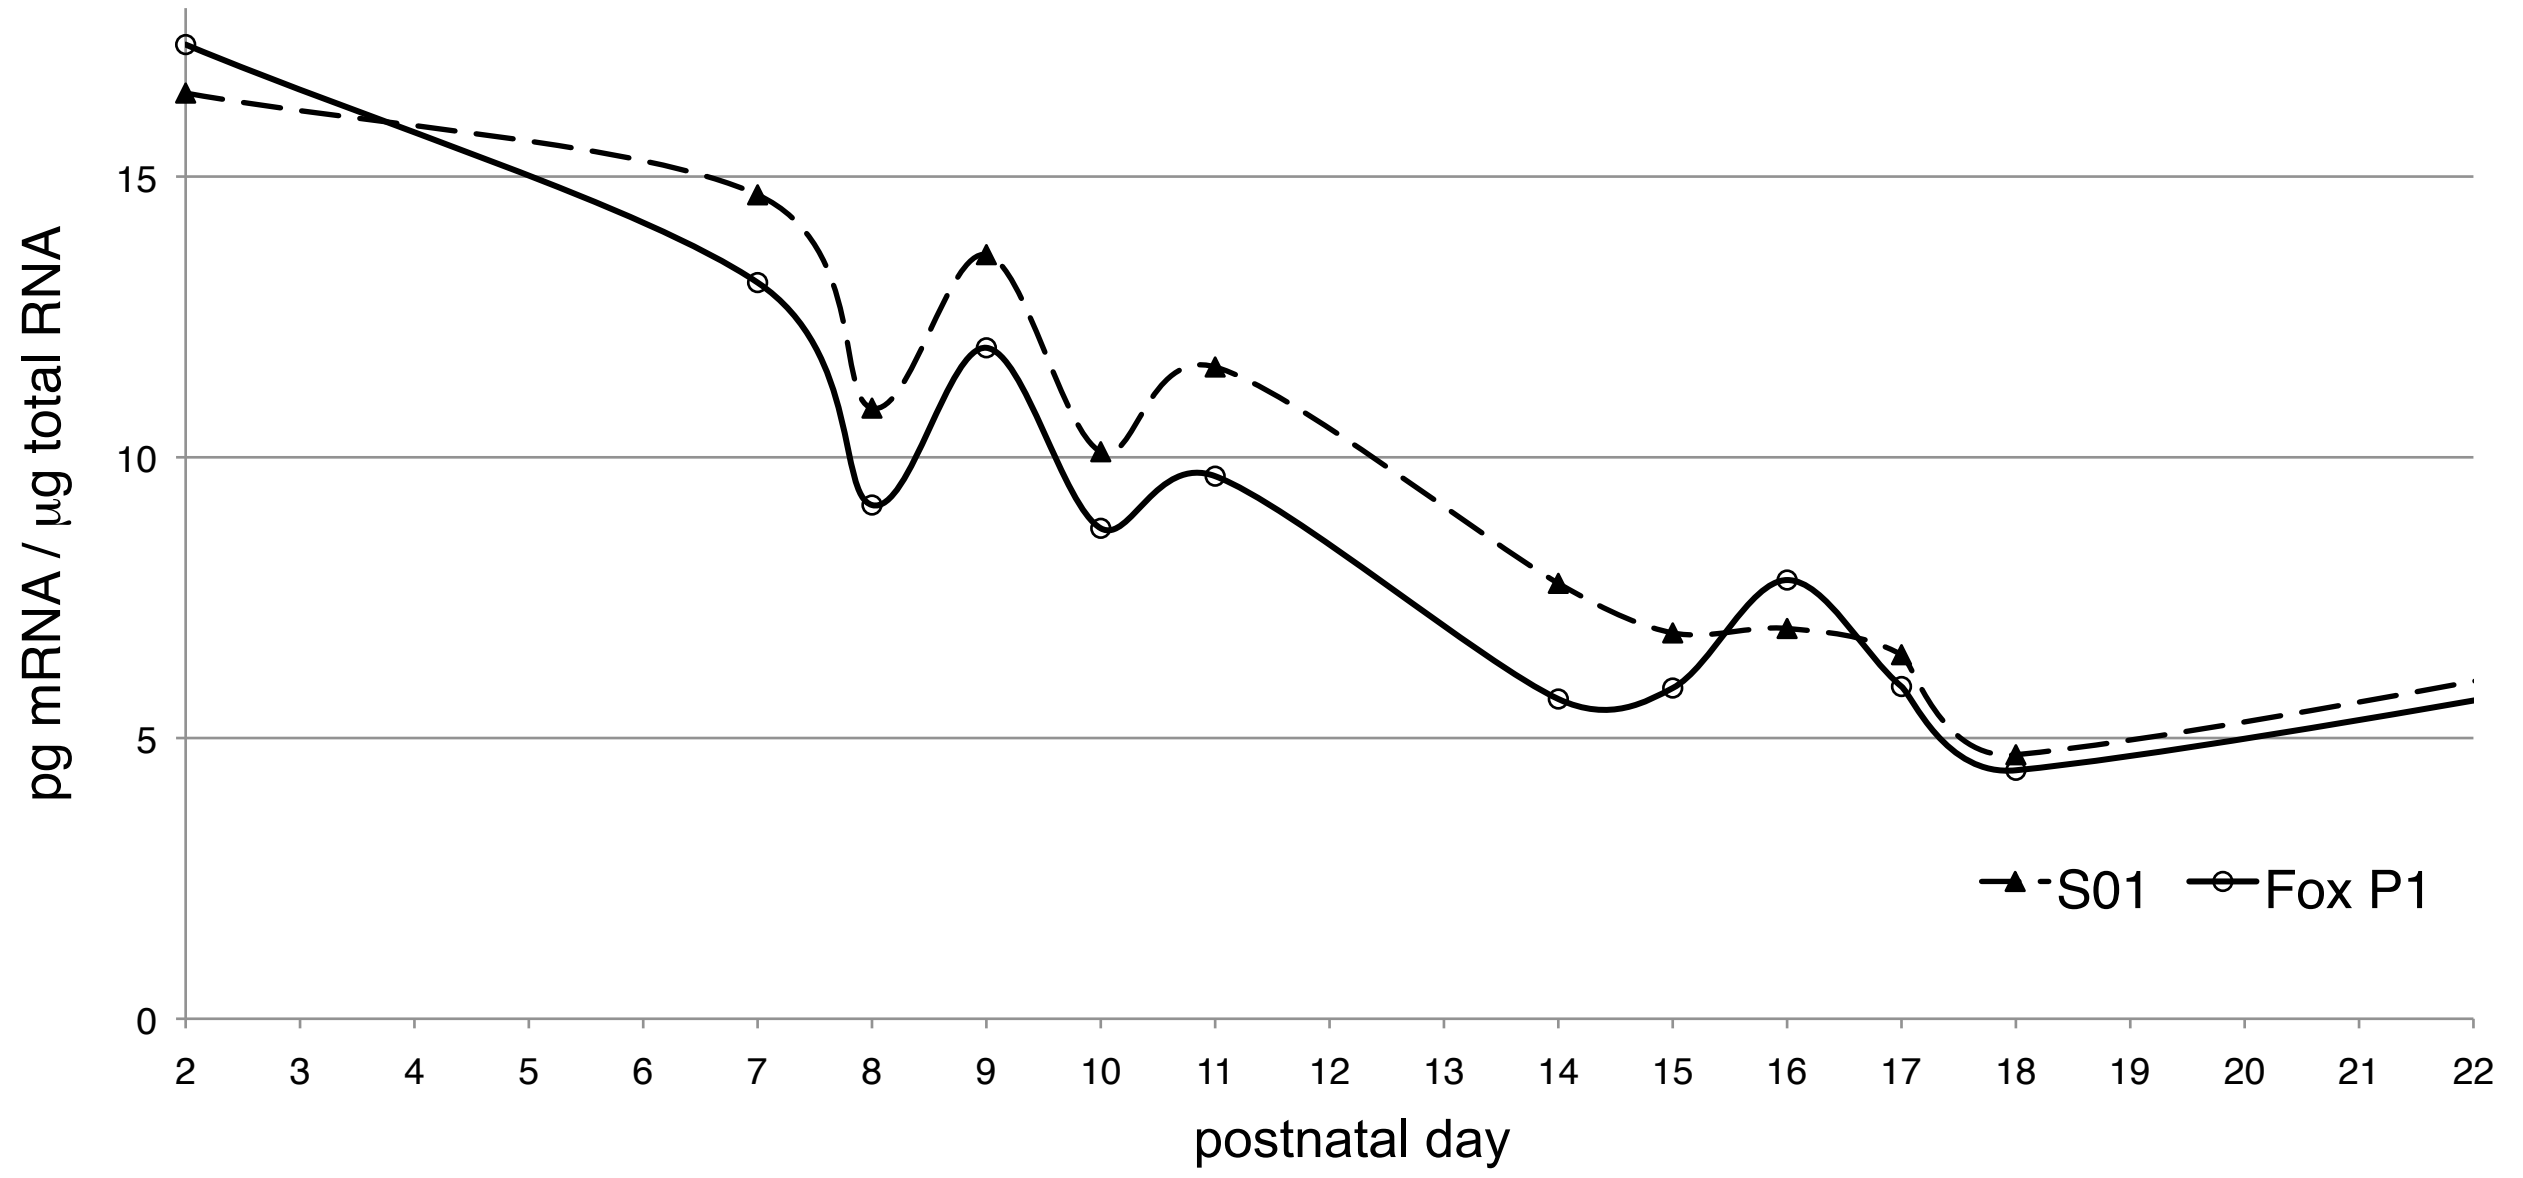

Supplement: NIHMS424360-supplement-Supp_FigureS3a.pdf [file NIHMS424360-supplement-Supp_FigureS3a.pdf]

# Expression of D2R, DRRF and S07

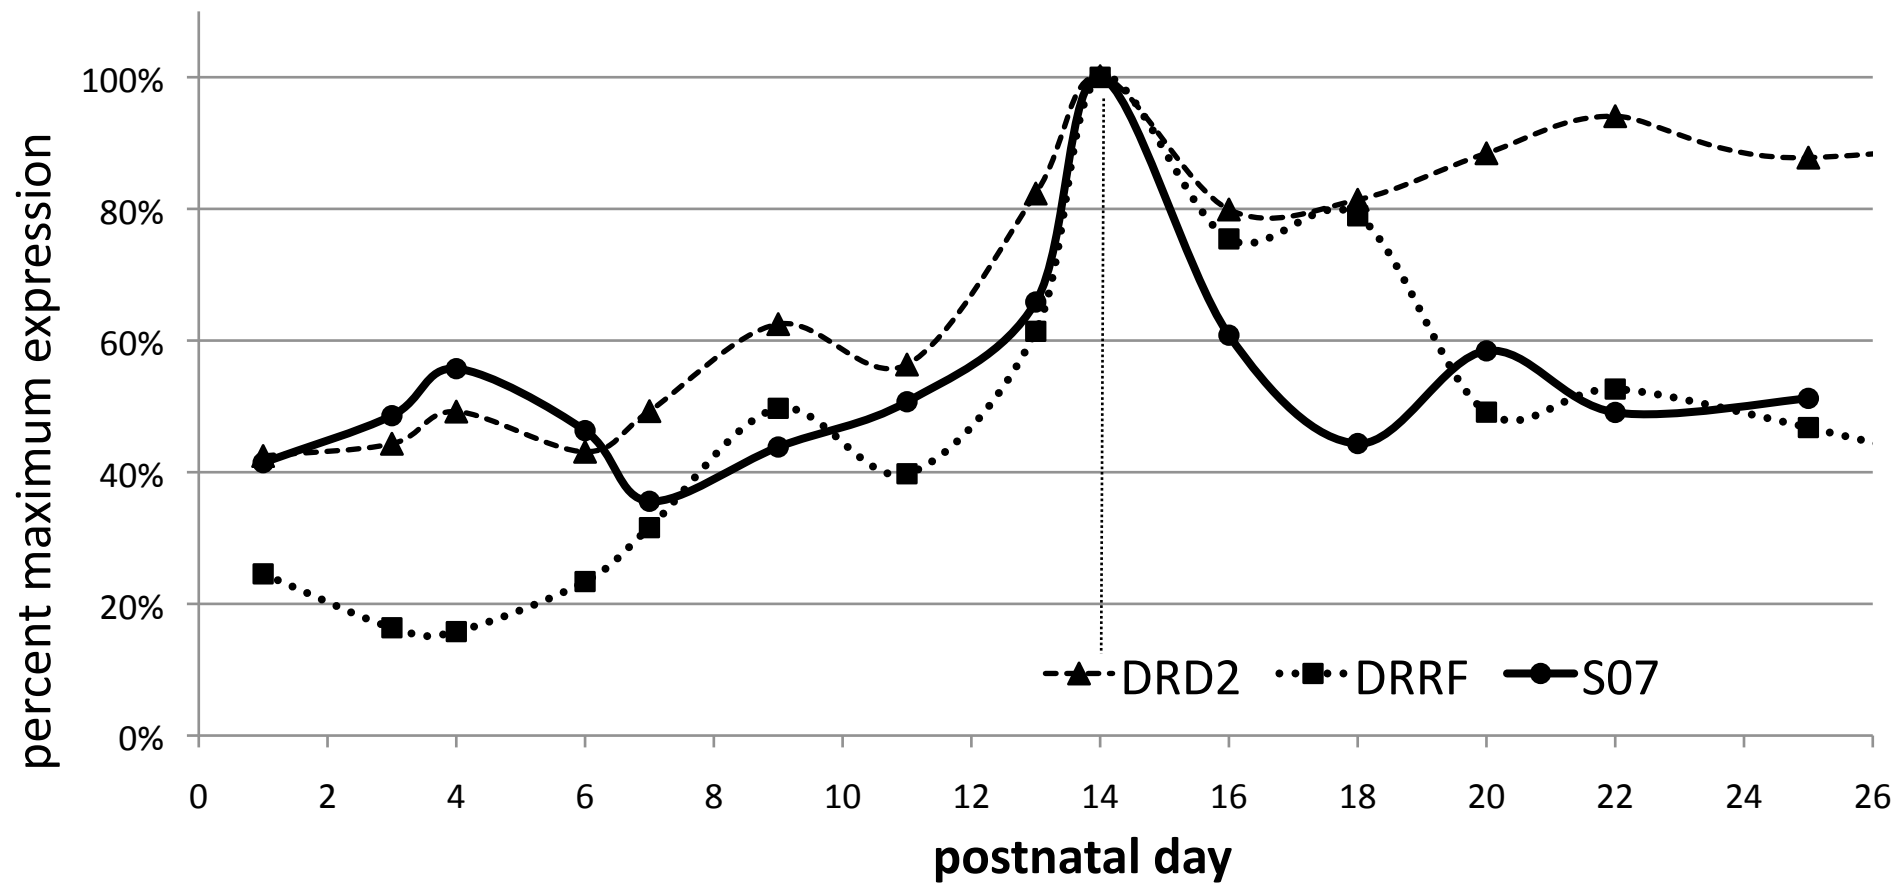

Supplement: NIHMS424360-supplement-Supp_FigureS3b.pdf [file NIHMS424360-supplement-Supp_FigureS3b.pdf]

**Znf 521**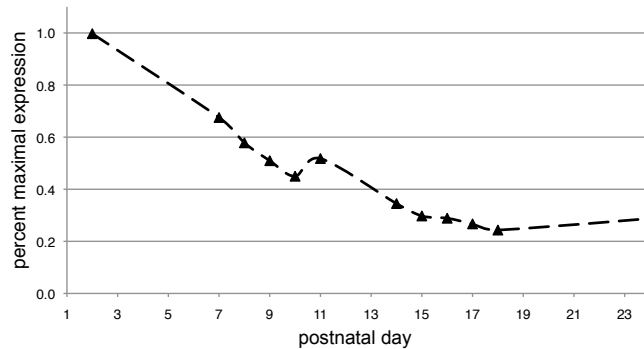**Fox P1**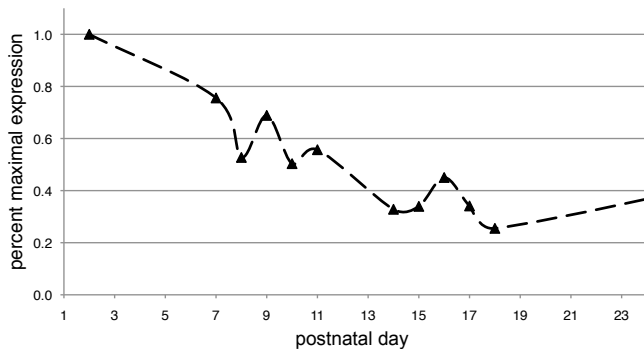**Gnb 4**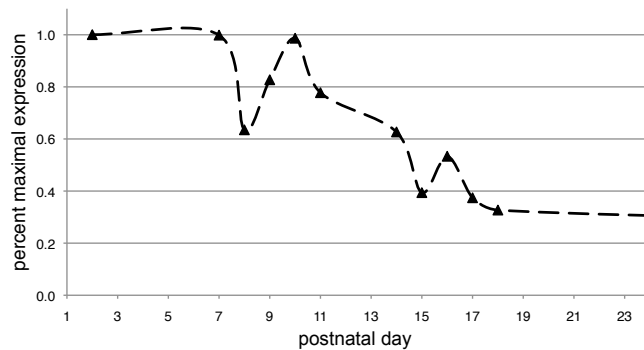**Epha 4**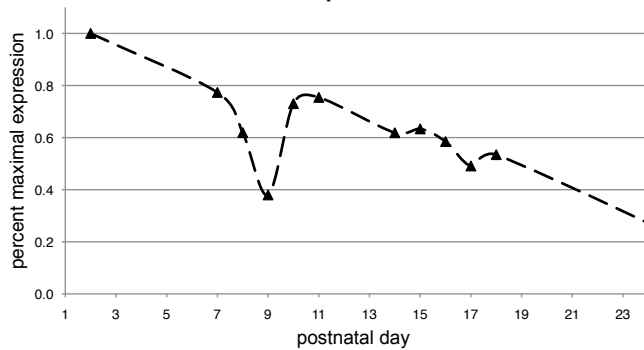

Supplement: NIHMS424360-supplement-Supp_FigureS3c.pdf [file NIHMS424360-supplement-Supp_FigureS3c.pdf]
